# Supplementary material for: Colour vision in stomatopod crustaceans: more questions than answers
Source: Oxford University Press journal article supplement (doi:10.1242/jeb.243699), 2022-02-28
Supplement: jeb243699supp.pdf [file jeb243699supp.pdf]

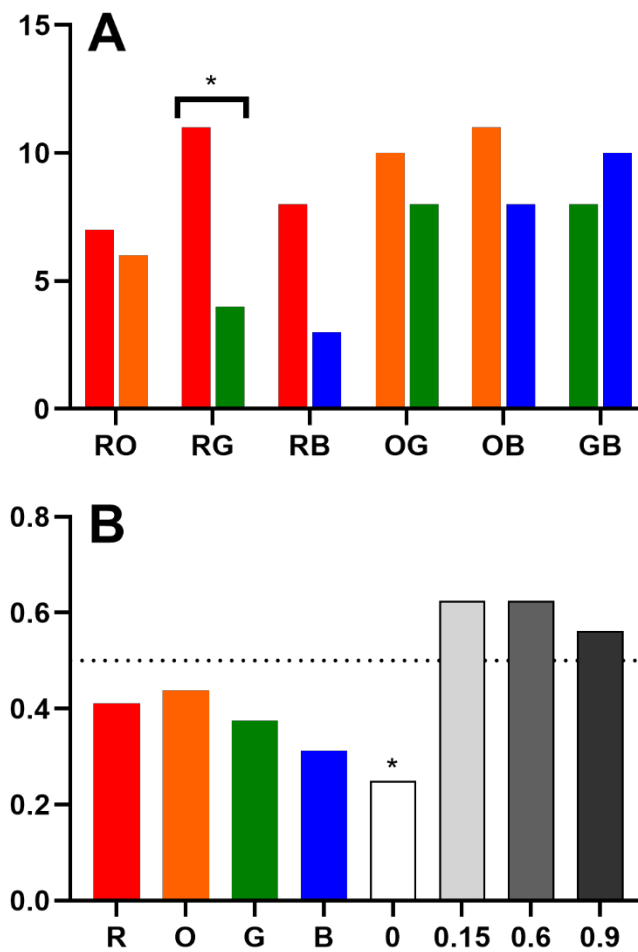

**Fig. S1. Details of naïve choice test. A)** High saturation choice test with comparison in each choice set. Only when animals were given the option of red or green was there a significant preference. **B)** More detailed results from high saturation colour versus grey preference.

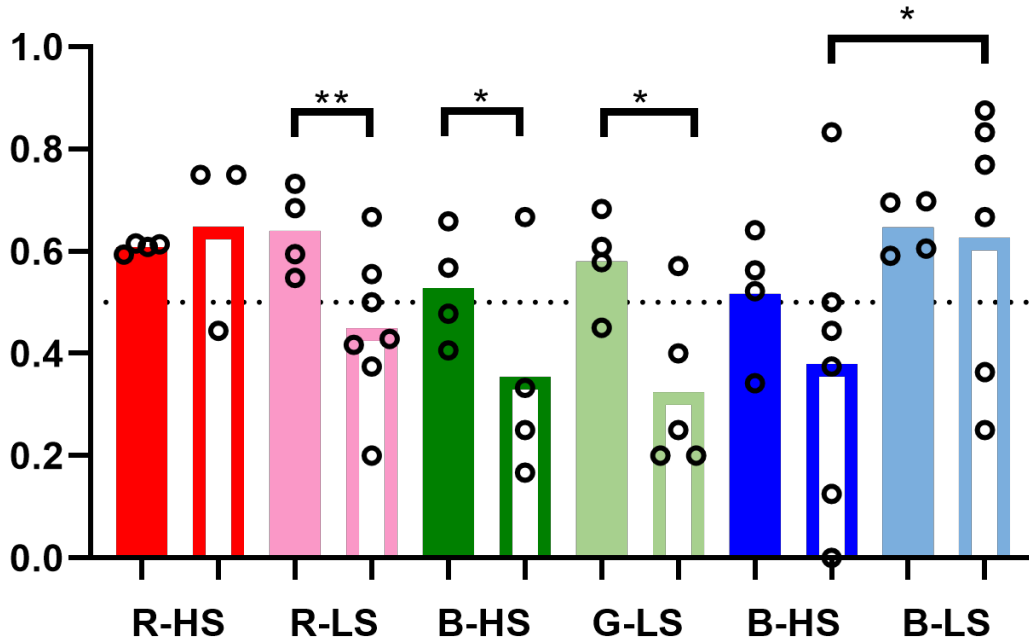

**Fig. S2. *G. smithii* performance in captivity.** Average performance of individual in high and low saturation stimulus learning. Comparison between individuals that have been in captivity for 1-2 months (solid bars) versus individuals in captivity for 6-12 months (open bars). Circles represent individual averages. Dotted black line refers to the level of chance.

**Table S1. Effect of neutral density distractors.** Probability of success in different groups (see methods) with for **(A)** each ND pair in Experiment 1, and **(B)** each ND type in Experiment 2. Italics give significance of difference (p values) using model: Success ~ ND + [1|individual].

| <b>A</b>         | <b>All</b>                | <b>R</b>                |                         | <b>O</b>            |                      | <b>G</b>                 |                       | <b>B</b>            |                           |
|------------------|---------------------------|-------------------------|-------------------------|---------------------|----------------------|--------------------------|-----------------------|---------------------|---------------------------|
|                  |                           | <b>HS</b>               | <b>LS</b>               | <b>HS</b>           | <b>LS</b>            | <b>HS</b>                | <b>LS</b>             | <b>HS</b>           | <b>LS</b>                 |
| <b>0/0</b>       | 0.65<br><i>0.0001***</i>  | 0.57<br><i>0.51</i>     | 0.74<br><i>0.0037**</i> | 0.36<br><i>0.37</i> | 0.73<br><i>0.19</i>  | 0.73<br><i>0.026*</i>    | 0.62<br><i>0.15</i>   | 0.48<br><i>0.90</i> | 0.75<br><i>0.0026**</i>   |
| <b>0/0.15</b>    | 0.51<br><i>0.00345**</i>  | 0.47<br><i>0.40</i>     | 0.49<br><i>0.025*</i>   | 0.63<br><i>0.27</i> | 0.60<br><i>0.55</i>  | 0.45<br><i>0.017*</i>    | 0.50<br><i>0.32</i>   | 0.30<br><i>0.15</i> | 0.79<br><i>0.68</i>       |
| <b>0/0.6</b>     | 0.57<br><i>0.0700</i>     | 0.52<br><i>0.59</i>     | 0.67<br><i>0.50</i>     | 0.38<br><i>0.95</i> | 0.50<br><i>0.26</i>  | 0.50<br><i>0.037*</i>    | 0.63<br><i>0.88</i>   | 0.42<br><i>0.62</i> | 0.75<br><i>1.0</i>        |
| <b>0/0.9</b>     | 0.58<br><i>0.142</i>      | 0.45<br><i>0.30</i>     | 0.52<br><i>0.047*</i>   | 0.62<br><i>0.22</i> | 0.76<br><i>0.75</i>  | 0.56<br><i>0.20</i>      | 0.52<br><i>0.39</i>   | 0.61<br><i>0.38</i> | 0.68<br><i>0.50</i>       |
| <b>0.15/0.15</b> | 0.38<br><i>4.6e-10***</i> | 0.30<br><i>0.011*</i>   | 0.43<br><i>0.0038**</i> | 0.29<br><i>0.62</i> | 0.42<br><i>0.092</i> | 0.35<br><i>0.0007***</i> | 0.46<br><i>0.15</i>   | 0.30<br><i>0.10</i> | 0.50<br><i>0.019*</i>     |
| <b>0.15/0.6</b>  | 0.43<br><i>1.8e-7***</i>  | 0.42<br><i>0.14</i>     | 0.44<br><i>0.0066**</i> | 0.40<br><i>0.85</i> | 0.42<br><i>0.093</i> | 0.45<br><i>0.0080**</i>  | 0.50<br><i>0.27</i>   | 0.39<br><i>0.50</i> | 0.38<br><i>0.00086***</i> |
| <b>0.15/0.9</b>  | 0.42<br><i>5.4e-6***</i>  | 0.32<br><i>0.049*</i>   | 0.45<br><i>0.027*</i>   | 0.36<br><i>0.98</i> | 0.48<br><i>0.20</i>  | 0.42<br><i>0.022*</i>    | 0.35<br><i>0.036*</i> | 0.29<br><i>0.36</i> | 0.67<br><i>0.49</i>       |
| <b>0.6/0.6</b>   | 0.43<br><i>4.9e-7***</i>  | 0.28<br><i>0.0074**</i> | 0.50<br><i>0.024*</i>   | 0.36<br><i>0.97</i> | 0.44<br><i>0.13</i>  | 0.45<br><i>0.014*</i>    | 0.45<br><i>0.14</i>   | 0.35<br><i>0.18</i> | 0.61<br><i>0.20</i>       |
| <b>0.6/0.9</b>   | 0.54<br><i>0.0373*</i>    | 0.50<br><i>0.54</i>     | 0.58<br><i>0.16</i>     | 0.29<br><i>0.73</i> | 0.50<br><i>0.28</i>  | 0.62<br><i>0.42</i>      | 0.62<br><i>1.0</i>    | 0.44<br><i>0.24</i> | 0.57<br><i>0.16</i>       |
| <b>0.9/0.9</b>   | 0.62<br><i>0.618</i>      | 0.67<br><i>0.42</i>     | 0.67<br><i>0.50</i>     | 0.48<br><i>0.54</i> | 0.38<br><i>0.078</i> | 0.63<br><i>0.43</i>      | 0.69<br><i>0.53</i>   | 0.53<br><i>0.85</i> | 0.77<br><i>0.81</i>       |

  

| <b>B</b>    | <b>All</b>                | <b>R</b>              | <b>G</b>                 | <b>B</b>               | <b>Set 1</b>           | <b>Set 2</b>              | <b>Set 3</b>         |
|-------------|---------------------------|-----------------------|--------------------------|------------------------|------------------------|---------------------------|----------------------|
|             |                           |                       |                          |                        | <b>(LIRS)</b>          |                           |                      |
| <b>0</b>    | 0.61<br><i>2.65e-5***</i> | 0.59<br><i>0.0504</i> | 0.66<br><i>0.00141**</i> | 0.61<br><i>0.0122*</i> | 0.61<br><i>0.0204*</i> | 0.73<br><i>5.26e-6***</i> | 0.43<br><i>0.642</i> |
| <b>0.15</b> | 0.58<br><i>0.0538</i>     | 0.54<br><i>0.224</i>  | 0.67<br><i>0.548</i>     | 0.56<br><i>0.121</i>   | 0.54<br><i>0.257</i>   | 0.63<br><i>0.102</i>      | 0.52<br><i>0.194</i> |
| <b>0.6</b>  | 0.58<br><i>0.0097**</i>   | 0.55<br><i>0.222</i>  | 0.60<br><i>0.256</i>     | 0.58<br><i>0.0242*</i> | 0.49<br><i>0.0564</i>  | 0.65<br><i>0.0401*</i>    | 0.51<br><i>0.348</i> |
| <b>0.9</b>  | 0.53<br><i>0.914</i>      | 0.47<br><i>0.686</i>  | 0.45<br><i>0.561</i>     | 0.66<br><i>0.282</i>   | 0.54<br><i>0.625</i>   | 0.57<br><i>0.596</i>      | 0.50<br><i>0.995</i> |

**Table S2. Preference in naïve two-choice tests.** Numbers refer to the amount of individuals that chose each option. **A)** Tests comparing two high saturation colours. **B)** Tests comparing two low saturation colours. **C)** Tests comparing high and low saturation types of each colour. **D)** Tests comparing a high saturation colour and a neutral grey. Significance calculated using a binomial test.

| <b>A</b> | <b>HS</b>     |           | <b>Total</b> | <b>p-value</b> |
|----------|---------------|-----------|--------------|----------------|
| R        | 36            |           | 54           | 0.0054 **      |
| O        | 32            |           | 68           | 0.086          |
| G        | 24            |           | 61           | 0.026 *        |
| B        | 28            |           | 57           | 0.104          |
| <b>B</b> | <b>LS</b>     |           |              |                |
| R        | 24            |           | 50           | 0.107          |
| O        | 23            |           | 51           | 0.087          |
| G        | 27            |           | 51           | 0.102          |
| B        | 28            |           | 52           | 0.095          |
| <b>C</b> | <b>HS</b>     | <b>LS</b> |              |                |
| R        | 11            | 9         | 20           | 0.160          |
| O        | 12            | 8         | 20           | 0.120          |
| G        | 11            | 9         | 20           | 0.160          |
| B        | 6             | 14        | 20           | 0.037 *        |
| <b>D</b> | <b>Colour</b> | <b>ND</b> |              |                |
| R        | 7             | 9         | 16           | 0.174          |
| O        | 7             | 9         | 16           | 0.174          |
| G        | 6             | 10        | 16           | 0.122          |
| B        | 5             | 11        | 16           | 0.067          |

**Table S3. Number of individuals and average participation per colour type per set in *G. smithii*.** Average success, standard error, and learning ability calculated as a binomial (see methods). *P-values* for high and low saturation performance in set 1 (short term) as well as from comparison of colour types between set 1 and set 2 (far right column).

†Model: Success ~ Type + ND + [1|individual]

‡Model: Success ~ Set + ND + [1|individual]

|            | Colour | Type | Individuals | Participation | Average % Success ±SE | Learning Ability | Compare Type† | Compare to Short-Term‡ |
|------------|--------|------|-------------|---------------|-----------------------|------------------|---------------|------------------------|
| Short-Term | R      | HS   | 4           | 34.5          | 60.8 ±0.5             | 0.0026 **        | 0.717         |                        |
|            |        | LS   |             | 35            | 64.0 ±4.2             | 0.0005 ***       |               |                        |
|            | G      | HS   |             | 36            | 52.8 ±5.5             | 0.0370 *         | 0.317         |                        |
|            |        | LS   |             | 26            | 58.0 ±4.9             | 0.0093 **        |               |                        |
|            | B      | HS   |             | 39            | 51.7 ±6.3             | 0.0591           | 0.0104 *      |                        |
|            |        | LS   |             | 42            | 64.7 ±2.9             | < 0.0001 ***     |               |                        |
| Long-Term  | R      | HS   | 3           | 5.7           | 64.8 ±10.2            | 0.1484           | 0.871         |                        |
|            |        | LS   | 7           | 8.9           | 44.9 ±5.7             | 0.0758           | 0.0057 **     |                        |
|            | G      | HS   | 4           | 5.5           | 35.4 ±11.0            | 0.0762 *         | 0.0293 *      |                        |
|            |        | LS   | 5           | 5.2           | 32.4 ±7.2             | 0.0466 *         | 0.0108 *      |                        |
|            | B      | HS   | 6           | 6.5           | 38.0 ±12.0            | 0.0457 *         | 0.273         |                        |
|            |        | LS   | 6           | 8             | 62.6 ±10.6            | 0.0151 *         | 0.824         |                        |
